## **Potent neutralization of SARS-CoV-2 in vitro and in an animal model by a human monoclonal antibody**

Wei Li<sup>1#</sup>, Aleksandra Drelich<sup>2#</sup>, David R. Martinez<sup>3#</sup>, Lisa Gralinski<sup>3#</sup>, Chuan Chen<sup>1#</sup>, Zehua Sun<sup>1#</sup>, Xianglei Liu<sup>1</sup>, Doncho Zhelev<sup>1</sup>, Liyong Zhang<sup>1</sup>, Eric C. Peterson<sup>4</sup>, Alex Conard<sup>4</sup>, John W. Mellors<sup>1,4</sup>, Chien-Te Tseng<sup>2</sup>, Ralph S. Baric<sup>3</sup> and Dimiter S. Dimitrov<sup>1,4</sup>

<sup>1</sup>Center for Antibody Therapeutics, Division of Infectious Diseases, Department of Medicine, University of Pittsburgh Medical School, 3550 Terrace Str, Pittsburgh, PA 15261, USA.

<sup>2</sup>Department of Microbiology & Immunology, Centers for Biodefense and Emerging Diseases, Galveston National Laboratory, 301 University Blvd, Galveston, Texas 77550, USA.

<sup>3</sup>University of North Carolina at Chapel Hill, 135 Dauer Drive, 3109 Michael Hooker Research Center Chapel Hill, NC 27599, USA.

<sup>4</sup>Abound Bio, 1401 Forbes Ave, Pittsburgh, PA 15219, USA.

Running title: A potent SARS-CoV-2 neutralizing antibody

#Equal Contribution

\*Corresponding Author:

Dimiter S. Dimitrov, PhD, ScD  
Center for Antibody Therapeutics  
Division of Infectious Diseases  
Department of Medicine  
University of Pittsburgh Medical School  
S843 Scaife Hall  
3550 Terrace Street  
Pittsburgh, PA 15261, USA  
Tel: 412-383-4702  
Fax: 412-383-7982  
E-mail: [mit666666@pitt.edu](mailto:mit666666@pitt.edu)

Key words: SARS-CoV-2, therapeutic antibodies, animal models

**Effective therapies are urgently needed for the SARS-CoV-2/COVID19 pandemic. We identified panels of fully human monoclonal antibodies (mAbs) from eight large phage-displayed Fab, scFv and VH libraries by panning against the receptor binding domain (RBD) of the SARS-CoV-2 spike (S) glycoprotein. One high affinity mAb, IgG1 ab1, specifically neutralized live SARS-CoV-2 with exceptional potency as measured by two different assays. It competed with human angiotensin-converting enzyme 2 (hACE2) for binding to RBD suggesting a competitive mechanism of virus neutralization. IgG1 ab1 protected transgenic mice expressing hACE2 from high-titer intranasal SARS-CoV-2 challenge ( $10^5$  plaque forming units). Another antibody, VH ab5 did not compete with hACE2 and ab1, and did not neutralize SARS-CoV-2 although its affinity was comparable to that of ab1. The ab1 sequence has relatively low number of somatic mutations indicating that ab1-like antibodies could be quickly elicited during natural SARS-CoV-2 infection or by RBD-based vaccines. IgG1 ab1 does not have developability liabilities, and thus has potential for therapy and prophylaxis of SARS-CoV-2 infections. The rapid identification (within 6 days) of potent mAbs shows the value of large antibody libraries for response to public health threats from emerging microbes.**

The severe acute respiratory distress coronavirus 2 (SARS-CoV-2) (1) has spread worldwide thus requiring safe and effective prevention and therapy. Inactivated serum from convalescent patients inhibited SARS-CoV-2 replication and decreased symptom severity of newly infected patients (2, 3) suggesting that monoclonal antibodies (mAbs) could be even more effective. Human mAbs are typically highly target-specific and relatively non-toxic. By using phage display we have previously identified a number of potent fully human mAbs (m396, m336, m102.4)

against emerging viruses including severe acute respiratory syndrome coronavirus (SARS-CoV) (4), Middle East respiratory syndrome coronavirus (MERS-CoV) (5) and henipaviruses (6, 7), respectively, which are also highly effective in animal models of infection (8-11); one of them was administered on a compassionate basis to humans exposed to henipaviruses and successfully evaluated in a clinical trial (12).

Size and diversity of phage-displayed libraries are critical for rapid selection of high affinity antibodies without the need for additional affinity maturation. Our exceptionally potent antibody against the MERS-CoV, m336, was directly selected from very large (size  $\sim 10^{11}$  clones) library from 50 individuals (5). However, another potent antibody, m102.4, against henipaviruses was additionally affinity matured from its predecessor selected from smaller library (size  $\sim 10^{10}$  clones) from 10 individuals (7, 13). Thus, to generate high affinity and safe mAbs we constructed eight very large (size  $\sim 10^{11}$  clones each) naive human antibody libraries in Fab, scFv or VH format using PBMCs from 490 individuals total obtained before the SARS-CoV-2 outbreak. Four of the libraries were based on single human VH domains where CDRs (except CDR1 which was mutagenized or grafted) from our other libraries were grafted as previously described (14).

Another important factor to consider when selecting effective mAbs is the appropriate antigen. Similar to SARS-CoV, SARS-CoV-2 uses the spike glycoprotein (S) to enter into host cells. The S receptor binding domain (RBD) binds to its receptor, the human angiotensin-converting enzyme 2 (hACE2), thus initiating series of events leading to virus entry into cells (15, 16). We have previously characterized the function of the SARS-CoV S glycoprotein and identified its RBD which is stable in isolation (17). The RBD was then used as an antigen to pan phage displayed antibody libraries; we identified potent antibodies (5, 8) more rapidly and the

antibodies were more potent than when we used whole S protein or S2 (unpublished). In addition, the SARS-CoV RBD based immunogens are highly immunogenic and elicit neutralizing antibodies which protect against SARS-CoV infections (18). Thus, to identify SARS-CoV-2 mAbs, we generated two variants of the SARS-CoV-2 RBD (aa 330-532) (Fig. S1) and used them as antigens for panning of our eight libraries.

Panels of high-affinity binders to RBD in Fab, scFv and VH domain formats were identified. There was no preferential use of any antibody VH gene (an example for a panel of binders selected from the scFv library is shown in Fig. S2A) and the number of somatic mutations was relatively low (Fig. S2B, for the same panel of binders as in Fig. S2A). The mAbs can be divided into two groups in terms of their competition with hACE2. Two representatives of each group are Fab ab1 and VH ab5. To further increase their binding through avidity effects and extend their half-life in vivo they were converted to IgG1 and VH-Fc fusion formats, respectively. Ab1 was characterized in more details because of its potential for prophylaxis and therapy of SARS-CoV-2 infection.

The Fab and IgG1 ab1 bound strongly to the RBD (Fig. 1A) and the whole SARS-CoV-2 S1 protein (Fig. 1B) as measured by ELISA. The Fab ab1 equilibrium dissociation constant,  $K_d$ , as measured by the biolayer interferometry technology (BLItz), was 1.5 nM (Fig. 1C). The IgG1 ab1 bound with high (160 pM) avidity to recombinant RBD (Fig. 1D). IgG1 ab1 bound cell surface associated native S glycoprotein suggesting that the conformation of its epitope on the RBD in isolation is close to that in the native S protein (Fig. 2, S3). The binding of IgG1 ab1 was of higher avidity than that of hACE2-Fc (Fig. 2B). Binding of ab1 was specific for the SARS-CoV-2 RBD; it did not bind to the SARS-CoV S1 (Fig. 3A) nor to cells that do not express SARS-CoV-2 S glycoprotein (Fig. 2A). Ab1 competed with hACE2 for binding to the RBD (Fig.

3B) indicating possible neutralization of the virus by preventing its binding to the receptor. It did not compete with the IgG1 CR3022 (Fig. 3C), which also binds to SARS-CoV (19) and with ab5 (Fig. 3D).

IgG1 ab1 exhibited potent neutralizing activity in two different assays using replication-competent SARS-CoV-2 - a microneutralization-based assay (100% neutralization, NT<sub>100</sub>, at <400 ng/ml) (Fig. 4A) and a luciferase reporter gene assay (IC<sub>50</sub> = 200 ng/ml) (Fig. 4B). In agreement with the specificity of binding to the SARS-CoV-2 S1 and not to the SARS-CoV S1 the IgG1 ab1 did not neutralize live SARS-CoV (Fig. 4A,C). The IgG1 m336 (5) control which is a potent neutralizer of MERS-CoV, did not exhibit any neutralizing activity against SARS-CoV-2 (Fig. 4). The VH ab5 and VH-Fc ab5 bound the RBD with high affinity and avidity (Fig. S4A,B) but did not compete with hACE-2 (Fig. S4C) or neutralize SARS-CoV-2 (Fig. 4B), indicating that not all antibodies targeting epitopes on the RBD affect virus replication.

To evaluate the efficacy of IgG1 ab1 in vivo we used transgenic mice which express human ACE2 (20). The mice were administered 0.3 mg of IgG1 ab1 or negative control 15 hours prior to intranasal infection with 10<sup>5</sup> plaque forming units (PFU) of SARS-CoV-2. No weight loss was observed over the course of the two-day infection. Lung tissue was homogenized in PBS and virus replication assessed by plaque assay on VeroE6 cells. Replication competent virus was not detected in four of the five mice which were treated with IgG1 ab1 (Figure 5). All six control mice and one of the treated mice had more than 10<sup>4</sup> PFU per lung (Figure 5). The difference between the IgG1 ab1 treated group and the control group is significant ( $p = 0.0113$ ). This result shows clear evidence of a preventive effect of IgG1 ab1 in vivo. The reason for absence of virus neutralization in one of the mice is unclear but may be due to individual variation in antibody transfer from the peritoneal cavity where it was administered to the upper and lower respiratory

tract. Our previous experiments with transgenic mice expressing human DPP4 and treated with two different doses of m336 (0.1 and 1 mg per mouse) showed similar lack of protection of one (out of four) mice at the lower dose but at the higher dose all four mice were protected (9). The *in vivo* protection also indicates that IgG1 ab1 can achieve neutralizing concentrations in the respiratory tract. This is the first report of *in vivo* activity of a human monoclonal antibody against SARS-CoV-2.

Interestingly, Fab ab1 had only several somatic mutations compared to the closest germline predecessor genes. This implies that ab1-like antibodies could be elicited relatively quickly by using RBD-based immunogens especially in some individuals with naïve mature B cells expressing the germline predecessors of ab1. This is in contrast to the highly mutated broadly neutralizing HIV-1 antibodies that require long maturation times, are difficult to elicit and their germline predecessors cannot bind native HIV-1 envelope glycoproteins (21, 22). The RBD of the MERS-CoV S protein was previously shown to elicit neutralizing antibodies (23, 24). For SARS-CoV-2 only a few somatic mutations would be sufficient to generate potent neutralizing antibodies against the SARS-CoV-2 RBD which is a major difference from the elicitation of broadly neutralizing antibodies against HIV-1 which requires complex maturation pathways (21, 25-28). The germline-like nature of the newly identified mAb ab1 also suggests that it has excellent developability properties that could accelerate its development for prophylaxis and therapy of SARS-CoV-2 infection (29).

To further assess the developability (drugability) of the antibodies their sequences were analyzed online ([opig.stats.ox.ac.uk/webapps/sabdab-sabpred/TAP.php](http://opig.stats.ox.ac.uk/webapps/sabdab-sabpred/TAP.php)); no obvious liabilities were found. In addition, we used dynamic light scattering (DLS) and size exclusion chromatography to evaluate its propensity for aggregation. IgG1 ab1 at a concentration of 2

mg/ml did not aggregate for six days incubation at 37°C as measured by DLS (Fig. 6A); there were no high molecular weight species in freshly prepared IgG1 ab1 also as measured by size exclusion chromatography (SEC) (Fig. 6B). IgG1 ab1 also did not bind to the human cell line 293T (Fig. 2A) even at very high concentration (1  $\mu$ M) which is about 660-fold higher than its  $K_d$  indicating absence of non-specific binding to many membrane-associated human proteins. The IgG1 ab1 also did not bind to 5,300 human membrane-associated proteins as measured by a membrane proteome array (Fig. 7).

The high affinity/avidity and specificity of IgG1 ab1 along with potent neutralization of virus and good developability properties suggests its potential use for prophylaxis and therapy of SARS-CoV-2 infection. Because it strongly competes with hACE2 indicating a certain degree of mimicry, one can speculate that mutations in the RBD may also lead to inefficient entry into cells and infection. However, in the unlikely case of mutations that decrease the ab1 binding to RBD it can be used in combination with other mAbs including those we identified or in bi(multi)specific formats to prevent infection of such SARS-CoV-2 isolates. Ab1 could also be used to select appropriate epitopes for vaccine immunogens and for diagnosis of SARS-CoV-2 infections. The identification of neutralizing mAbs within days of target availability shows the potential value of large antibody libraries for rapid response to emerging viruses.

## References

1. P. Zhou *et al.*, A pneumonia outbreak associated with a new coronavirus of probable bat origin. *Nature* **579**, 270-273 (2020).
2. L. Chen, J. Xiong, L. Bao, Y. Shi, Convalescent plasma as a potential therapy for COVID-19. *The Lancet Infectious Diseases*, (2020).
3. M. Hoffmann *et al.*, SARS-CoV-2 Cell Entry Depends on ACE2 and TMPRSS2 and Is Blocked by a Clinically Proven Protease Inhibitor. *Cell*, (2020).
4. P. Prabakaran *et al.*, Structure of severe acute respiratory syndrome coronavirus receptor-binding domain complexed with neutralizing antibody. *J Biol Chem* **281**, 15829-15836 (2006).
5. T. Ying *et al.*, Exceptionally potent neutralization of Middle East respiratory syndrome coronavirus by human monoclonal antibodies. *J Virol* **88**, 7796-7805 (2014).
6. Z. Zhu *et al.*, Potent neutralization of Hendra and Nipah viruses by human monoclonal antibodies. *J Virol* **80**, 891-899 (2006).
7. Z. Zhu *et al.*, Exceptionally potent cross-reactive neutralization of Nipah and Hendra viruses by a human monoclonal antibody. *J Infect Dis* **197**, 846-853 (2008).
8. Z. Zhu *et al.*, Potent cross-reactive neutralization of SARS coronavirus isolates by human monoclonal antibodies. *Proc Natl Acad Sci U S A* **104**, 12123-12128 (2007).
9. A. S. Agrawal *et al.*, Passive Transfer of A Germline-like Neutralizing Human Monoclonal Antibody Protects Transgenic Mice Against Lethal Middle East Respiratory Syndrome Coronavirus Infection. *Sci Rep* **6**, 31629 (2016).
10. K. N. Bossart *et al.*, A neutralizing human monoclonal antibody protects against lethal disease in a new ferret model of acute nipah virus infection. *PLoS Pathog* **5**, e1000642 (2009).
11. K. N. Bossart *et al.*, A neutralizing human monoclonal antibody protects african green monkeys from hendra virus challenge. *Sci Transl Med* **3**, 105ra103 (2011).
12. E. G. Playford *et al.*, Safety, tolerability, pharmacokinetics, and immunogenicity of a human monoclonal antibody targeting the G glycoprotein of henipaviruses in healthy adults: a first-in-human, randomised, controlled, phase 1 study. *Lancet Infect Dis*, (2020).
13. Z. Zhu, D. S. Dimitrov, Construction of a large naive human phage-displayed Fab library through one-step cloning. *Methods Mol Biol* **525**, 129-142, xv (2009).
14. W. Chen, Z. Zhu, Y. Feng, X. Xiao, D. S. Dimitrov, Construction of a large phage-displayed human antibody domain library with a scaffold based on a newly identified highly soluble, stable heavy chain variable domain. *Journal of molecular biology* **382**, 779-789 (2008).
15. R. Yan *et al.*, Structural basis for the recognition of SARS-CoV-2 by full-length human ACE2. **367**, 1444-1448 (2020).
16. S. Jiang, L. Du, Z. Shi, An emerging coronavirus causing pneumonia outbreak in Wuhan, China: calling for developing therapeutic and prophylactic strategies. *Emerg Microbes Infect* **9**, 275-277 (2020).



17. X. Xiao, S. Chakraborti, A. S. Dimitrov, K. Gramatikoff, D. S. Dimitrov, The SARS-CoV S glycoprotein: expression and functional characterization. *Biochem Biophys Res Commun* **312**, 1159-1164 (2003).
18. Y. He *et al.*, Identification of a critical neutralization determinant of severe acute respiratory syndrome (SARS)-associated coronavirus: importance for designing SARS vaccines. *Virology* **334**, 74-82 (2005).
19. J. ter Meulen *et al.*, Human monoclonal antibody combination against SARS coronavirus: synergy and coverage of escape mutants. *PLoS Med* **3**, e237 (2006).
20. V. D. Menachery *et al.*, SARS-like WIV1-CoV poised for human emergence. *Proceedings of the National Academy of Sciences of the United States of America* **113**, 3048-3053 (2016).
21. D. S. Dimitrov, Therapeutic antibodies, vaccines and antibodyomes. *MAbs* **2**, 347-356 (2010).
22. X. Xiao *et al.*, Germline-like predecessors of broadly neutralizing antibodies lack measurable binding to HIV-1 envelope glycoproteins: implications for evasion of immune responses and design of vaccine immunogens. *Biochem Biophys Res Commun* **390**, 404-409 (2009).
23. H. Mou *et al.*, The receptor binding domain of the new Middle East respiratory syndrome coronavirus maps to a 231-residue region in the spike protein that efficiently elicits neutralizing antibodies. *J Virol* **87**, 9379-9383 (2013).
24. L. Du *et al.*, Identification of a receptor-binding domain in the S protein of the novel human coronavirus Middle East respiratory syndrome coronavirus as an essential target for vaccine development. *J Virol* **87**, 9939-9942 (2013).
25. F. Klein *et al.*, Somatic mutations of the immunoglobulin framework are generally required for broad and potent HIV-1 neutralization. *Cell* **153**, 126-138 (2013).
26. P. Prabakaran *et al.*, Origin, diversity, and maturation of human antiviral antibodies analyzed by high-throughput sequencing. *Front Microbiol* **3**, 277 (2012).
27. H. X. Liao *et al.*, Co-evolution of a broadly neutralizing HIV-1 antibody and founder virus. *Nature* **496**, 469-476 (2013).
28. X. Xiao, W. Chen, Y. Feng, D. S. Dimitrov, Maturation Pathways of Cross-Reactive HIV-1 Neutralizing Antibodies. *Viruses* **1**, 802-817 (2009).
29. H. Persson *et al.*, In Vitro Evolution of Antibodies Inspired by In Vivo Evolution. *Front Immunol* **9**, 1391-1391 (2018).
30. X. Tian *et al.*, Potent binding of 2019 novel coronavirus spike protein by a SARS coronavirus-specific human monoclonal antibody. *Emerg Microbes Infect* **9**, 382-385 (2020).
31. M. Y. Zhang *et al.*, Broadly cross-reactive HIV neutralizing human monoclonal antibody Fab selected by sequential antigen panning of a phage display library. *J Immunol Methods* **283**, 17-25 (2003).
32. L. Du *et al.*, A conformation-dependent neutralizing monoclonal antibody specifically targeting receptor-binding domain in Middle East respiratory syndrome coronavirus spike protein. *J Virol* **88**, 7045-7053 (2014).
33. A. S. Agrawal *et al.*, Immunization with inactivated Middle East Respiratory Syndrome coronavirus vaccine leads to lung immunopathology on challenge with live virus. *Hum Vaccin Immunother* **12**, 2351-2356 (2016).

34. L. Du *et al.*, A Truncated Receptor-Binding Domain of MERS-CoV Spike Protein Potently Inhibits MERS-CoV Infection and Induces Strong Neutralizing Antibody Responses: Implication for Developing Therapeutics and Vaccines. *PLOS ONE* **8**, e81587 (2013).
35. T. Scobey *et al.*, Reverse genetics with a full-length infectious cDNA of the Middle East respiratory syndrome coronavirus. *Proc Natl Acad Sci U S A* **110**, 16157-16162 (2013).
36. B. Yount *et al.*, Reverse genetics with a full-length infectious cDNA of severe acute respiratory syndrome coronavirus. *Proc Natl Acad Sci U S A* **100**, 12995-13000 (2003).
37. X. Brochet, M. P. Lefranc, V. Giudicelli, IMGT/V-QUEST: the highly customized and integrated system for IG and TR standardized V-J and V-D-J sequence analysis. *Nucleic Acids Res* **36**, W503-508 (2008).
38. M. I. J. Raybould *et al.*, Five computational developability guidelines for therapeutic antibody profiling. *Proc Natl Acad Sci U S A* **116**, 4025-4030 (2019).
39. D. F. Tucker *et al.*, Isolation of state-dependent monoclonal antibodies against the 12-transmembrane domain glucose transporter 4 using virus-like particles. *Proc Natl Acad Sci U S A* **115**, E4990-e4999 (2018).

**Acknowledgments:** We would like to thank the members of the Center for Antibody Therapeutics Megan Shi, Cynthia Adams, Du-San Baek and Xioajie Chu for their help with some of the experiments and helpful discussions. We also thank Rui Gong from the Institute of Virology in Wuhan and Rachel Fong from Integral Molecular for helpful suggestions. This work was supported by the University of Pittsburgh Medical Center. David R. Martinez is funded by an NIH NIAID T32 AI007151 and a Burroughs Wellcome Fund Postdoctoral Enrichment Program Award. RSB is supported by grants from the NIH AI132178 and AI108197. Some monoclonal antibodies were generated by the UNC Protein Expression and Purification (PEP) core facility, which is funded by NIH grant P30CA016086.

**Author contributions:** DSD, RSB, CTT, JWM and WL conceived and designed the research; WL, ZS and DVZ identified and characterized antibodies; CC made the RBD, ACE2 and other antigens and characterized them; XL and LZ made and characterized reagents and performed some of the experiments; AC performed bioinformatic analysis; EP characterized proteins and helped with the proteome assay; AD and DM performed the neutralization assays; LG performed

the animal study; DSD and WL wrote the first draft of the article, and all authors discussed the results and contributed to the manuscript.

**Competing interests:** Wei Li, Chuan Chen, Zehua Sun, Doncho Zhelev, John W. Mellors and Dimiter S. Dimitrov are coinventors of a patent, filed in the beginning of March by the University of Pittsburgh concerning the SARS-CoV-2 specific antibodies described in this paper.

## **Materials and Methods**

**Generation, Expression and Characterization of SARS-CoV-2 RBD-Fc, S1-Fc, ACE2-Fc and CR3022 Fab.** The SARS-CoV-2 surface glycoprotein and the anti-SARS-CoV antibody IgG1 CR3022 (30) and IgG1 S230 genes were synthesized by IDT (Coralville, Iowa). MERS-CoV-specific IgG1 m336 antibody was expressed in human mammalian cell as described previously (5). The ACE2 gene was ordered from OriGene (Rockville, MD). The RBD domain (residues 330-532) and S1 domain (residues 14-675) and ACE2 (residues 18-740) genes were cloned into plasmid which carries a CMV promotor with an intron, human IgG1 Fc region and Woodchuck posttranscriptional regulatory element (WPRE) to generate the RBD-Fc, S1-Fc and ACE2-Fc expression plasmids. The RBD-avi-his protein with an avi tag followed by a 6×His tag at C-terminal was subcloned similarly. These proteins were expressed with Expi293 expression system (Thermo Fisher Scientific) and purified with protein A resin (GenScript) and by Ni-NTA resin (Thermo Fisher Scientific). The Fab CR3022 antibody gene with a His tag was cloned into pCAT2 plasmid (developed in house) for expression in HB2151 bacteria and purified with Ni-NTA resin. Protein purity was estimated as >95% by SDS-PAGE and protein concentration was measured spectrophotometrically (NanoVue, GE Healthcare).

## **Selection, Expression, and Purification of the RBD-specific Fabs and VHs and Conversion to IgG1s or Fc Fusion Proteins.**

The naïve human antibody phage display libraries were made based on the antibody cDNA from 490 healthy donors peripheral blood monocytes (PBMCs) and splenocytes. The Fab and scFv libraries were constructed by randomly pairing antibody VH and VL gene, and the VH libraries - by grafting CDRs into stable VH scaffolds. These libraries contain very large transformants (size for each  $\sim 10^{11}$ ) and are highly diverse (unpublished). For panning, the libraries were preabsorbed on streptavidin-M280-Dynabeads in PBS for 1 h at room temperature (RT) and incubated with 50 nM biotinylated SARS-CoV-2 RBD for 2 h at room temperature with gentle agitation. Phage particles binding to biotinylated antigen were separated from the phage library using streptavidin-M280-Dynabeads and a magnetic separator (Dyna). After washing for 20 times with 1 ml of PBS containing 0.1% Tween-20 and another 20 times with 1 ml of PBS, bound phage particles were eluted from the beads using 100 mM triethanolamine followed by neutralization with 1 M, pH 7.5 Tris-HCl. For the 2<sup>nd</sup> round of panning, 10 nM (2 nM for the 3<sup>rd</sup> round) of biotinylated antigen was used as antigen. After the 3<sup>rd</sup> round of panning against 2 nM biotinylated antigen, 96 individual clones were screened for binding to RBD-Fc fusion protein by phage ELISA. Panels of Fabs and VHs were selected and sequenced. For conversion to Fc-fusion, the VH gene was subcloned into pSecTag B vector (already containing human Fc fragment). For conversion to IgG1, Fab VH and VL gene was inserted into pDR12 vector which contains the IgG1 CH1-CH3 and CL domains. Both VH-Fc and IgG1 were expressed as previously described(31). Protein purity was estimated as >95% by SDS-PAGE and protein concentration was measured spectrophotometrically (NanoVue, GE Healthcare).

**ELISA.** The SARS-CoV-2 RBD (residues 330-532) protein was coated on a 96-well plate (Costar) at 100 ng/well in PBS overnight at 4°C. For phage ELISA, phage from each round of panning (polyclonal phage ELISA) or clones randomly picked from the infected TG1 cells (monoclonal phage ELISA) were incubated with immobilized antigen. Bound phage were detected with horseradish peroxidase (HRP) conjugated anti-M13-HRP polyclonal Ab (Pharmacia, Piscataway, NJ). For the soluble Fab/VH binding assay, HRP-conjugated mouse anti-FLAG tag Ab (Sigma-Aldrich) was used to detect Fab/VH binding. For the IgG1 or VH-Fc binding assay, HRP-conjugated goat anti-human IgG Fc (Sigma-Aldrich) was used for detection. For the competition ELISA with hACE2, 2 nM of human ACE2-mouse Fc was incubated with serially diluted Fab, VH, IgG, or VH-Fc, and the mixtures were added to RBD coated wells. After washing, bound ACE2-mouse Fc was detected by HRP-conjugated anti mouse IgG (Fc specific) (Sigma-Aldrich). Another way to do hACE2 competition ELISA is to incubate the fixed concentration of biotinylated hACE2-Fc with gradient concentrations of antibody. After washing, the bound hACE2 was detected by HRP conjugated streptavidin. For the competition ELISA with CR3022, 10 nM IgG1 CR3022 was incubated with serially diluted Fab ab1 or VH ab5, and the mixtures were added to RBD-his coated wells. After washing, bound IgG1 CR3022 was detected by HRP-conjugated anti human Fc antibody. For the competition ELISA between ab1 and ab5, 6 nM biotinylated IgG1 ab1 was incubated with RBD-Fc in the presence of different concentrations of VH ab5 or VH-Fc ab5. After washing, detection was made by using HRP conjugated streptavidin. All the colors were developed by 3,3',5,5'-tetramethylbenzidine (TMB, Sigma) and stopped by 1 M H<sub>2</sub>SO<sub>4</sub> followed by recording absorbance at 450 nm. Experiments were performed in duplicate and the error bars denote  $\pm$  SD, n=2.

**BLItz.** Antibody affinities and avidities were analyzed by the biolayer interferometry BLItz (ForteBio, Menlo Park, CA). For affinity measurements, protein A biosensors (ForteBio: 18–5010) were coated with RBD-Fc for 2 min and incubated in DPBS (pH = 7.4) to establish baselines. 125 nM, 250 nM and 500 nM VH and Fab were used for association. For avidity measurements, RBD-Fc was biotinylated with EZ-link sulfo-NHS-LC-biotin (Thermo Fisher Scientific, Waltham, MA) (RBD-Fc-Bio). Streptavidin biosensors (ForteBio: 18–5019) were coated with RBD-Fc-Bio for 2 min and incubated in DPBS (pH = 7.4) to establish baselines. 50 nM, 100 nM and 200 nM IgG1 ab1 and VH-Fc ab5 were chosen for association. The association was monitored for 2 min and then the antibody allowed to dissociate in DPBS for 4 min. The  $k_a$  and  $k_d$  were derived from the sensorgrams fitting and used for  $K_d$  calculation.

**Flow Cytometry Analysis.** Full-length S protein of SARS-CoV-2 with native signal peptide replaced by the CD5 signal peptide were codon-optimized and synthesized by IDT. S gene was subcloned into our in-house mammalian cell expression plasmid, which were used to transiently transfect 293T cells cultured in Dulbecco's Modified Eagle's Medium (DMEM) with 10% FBS, 1% P/S. The transient expression level is tested by FACS staining using the recombinant hACE2-Fc, IgG1 CR3022 and IgG1 ab1. For the determination of binding avidity of IgG1 ab1 and hACE2-Fc to the cell surface S, quantitative FACS was performed by using the 48 h post transfection cells based on standard procedures. Briefly, 5 folds serially diluted antibodies or hACE2-Fc with highest concentration of 1  $\mu$ M were added into  $1 \times 10^6$  cells and incubate at 4 °C for 30 min followed by 3 times washing using PBS + 0.5% BSA buffer (PBSA buffer). Then cells were resuspended to 100  $\mu$ l PBSA buffer followed by addition of 1  $\mu$ l PE conjugated anti-human Fc antibody (Sigma-Aldrich) and incubate at 4 °C for 30 min. Cells then was washed by PBSA for 3 times and then analyzed by flow cytometry using BD LSR II (San Jose, CA). The

gating of PE-A+ population was performed by FlowJo\_V10\_CL. The concentrations at which IgG1 ab1 or hACE2-Fc achieved 50% PE-A+ cells (EC<sub>50</sub>) was obtained by fitting using the equation of “[agonist] vs. response -- variable slope (four parameter)” in the Graphpad Prism 7 (San Diego, CA).

**SARS-CoV and SARS-CoV-2 Microneutralization Assay.** The standard live virus-based microneutralization (MN) assay was used as previously described (9, 32-34). Briefly, serially three-fold and duplicate dilutions of individual monoclonal antibodies (mAbs) were prepared in 96-well microtiter plates with a final volume of 60 µl per well before adding 120 infectious units of SARS-CoV or SARS-CoV-2 in 60 µl to individual wells. The plates were mixed well and cultured at room temperature for 2 h before transferring 100 µl of the antibody-virus mixtures into designated wells of confluent Vero E6 cells grown in 96-well microtiter plates. Vero E6 cells cultured with medium with or without virus were included as positive and negative controls, respectively. Additionally, Vero E6 cells treated with the MERS-CoV RBD-specific neutralizing m336 mAb (5) were included as additional controls. After incubation at 37 °C for 4 days, individual wells were observed under the microcopy for the status of virus-induced formation of cytopathic effect. The efficacy of individual mAbs was expressed as the lowest concentration capable of completely preventing virus-induced cytopathic effect in 100% of the wells.

**SARS-CoV and SARS-CoV-2 Reporter Gene Neutralization Assay.** Full-length viruses expressing luciferase were designed and recovered via reverse genetics and described previously (35, 36). Viruses were tittered in Vero E6 USAMRID cells to obtain a relative light units (RLU) signal of at least 20× the cell only control background. Vero E6 USAMRID cells were plated at 20,000 cells per well the day prior in clear bottom black walled 96-well plates (Corning 3904).



MAB samples were tested at a starting dilution 100 µg/ml, and were serially diluted 4-fold up to eight dilution spots. SARS-CoV-UrbainLuc, and SARS-CoV-2-SeattlenLuc viruses were diluted in separate biological safety cabinets (BSC) in accordance with UNC safety rules and were mixed with serially diluted antibodies. Antibody-virus complexes were incubated at 37°C with 5% CO<sub>2</sub> for 1 hour. Following incubation, growth media was removed and virus-antibody dilution complexes were added to the cells in duplicate. Virus-only controls and cell-only controls were included in each neutralization assay plate. Following infection, plates were incubated at 37°C with 5% CO<sub>2</sub> for 48 hours. After the 48 hours incubation, cells were lysed and luciferase activity was measured via Nano-Glo Luciferase Assay System (Promega) according to the manufacturer specifications. SARS-CoV and SARS-CoV-2 neutralization IC<sub>50</sub> were defined as the sample concentration at which a 50% reduction in RLU was observed relative to the average of the virus control wells. Experiments were performed in duplicate and IC<sub>50</sub> was obtained by the fitting of neutralization curves with the “sigmoidal dose-response (variable slope)” equation in Graphpad Prism 7.

**Evaluation of IgG1 ab1 Protective Efficacy in a hACE2 Mouse Model of Infection.** Human ACE2 transgenic 6-9 week old C3B6 mice were treated intraperitoneally with 0.3 mg of antibody (5 mice) or negative controls (6 mice) 15 hours prior to intranasal infection with 10<sup>5</sup> PFU of SARS-CoV-2. No weight loss was observed over the course of the two-day infection. Lung tissue was homogenized in PBS and virus replication assessed by plaque assay on VeroE6 cells. The assay limit of detection was 100 PFU.**Dynamic Light Scattering (DLS).** For evaluation of aggregation propensity, IgG1-ab1 were buffer-changed to DPBS and filtered through a 0.22 µm filter. The concentration was adjusted to 2 mg/mL; ~500 µL samples were incubated at 37 °C. On day 0, day 1 and day 6, samples were taken out for DLS measurement on



Zetasizer Nano ZS ZEN3600 (Malvern Instruments Limited, Westborough, MA) to determine the size distributions of protein particles.

**Size exclusion chromatography (SEC).** The Superdex 200 Increase 10/300 GL chromatography (GE Healthcare, Cat. No. 28990944) was used. The column was calibrated with protein molecular mass standards of Ferritin (Mr 440 000 kDa), Aldolase (Mr 158 000 kDa), Conalbumin (Mr 75 000 kDa), Ovalbumin (Mr 44 000 kDa), Carbonic anhydrase (Mr 29 000 kDa), Ribonuclease A (Mr 13 700 kDa). ~150 ul filtered proteins (1.5 mg/ml) in PBS were used for analysis. Protein was eluted by DPBS buffer at a flow rate of 0.5 ml/min.

**Computational Analysis of Antibody Sequences.** IMGT/V-QUEST tool (37) was used to perform immunogenetic analysis of SARS-CoV-2 RBD-specific mAbs. The unrooted circular phylogram tree of our scFv binders was constructed by using the neighbor joining methods through CLC Genomics Workbench 20.0 (<https://digitalinsights.qiagen.com>). The RBD sequences were obtained from <https://www.ncbi.nlm.nih.gov/genbank/sars-cov-2-seqs/>. Liabilities were evaluated online ([opig.stats.ox.ac.uk/webapps/sabdab-sabpred/TAP.php](http://opig.stats.ox.ac.uk/webapps/sabdab-sabpred/TAP.php)) (38).

**Membrane Proteome Array Specificity Testing Assay.** Integral Molecular, Inc. (Philadelphia, PA) performed specificity testing of IgG1 ab1 using the Membrane Proteome Array (MPA) platform. The MPA comprises 5,300 different human membrane protein clones, each overexpressed in live cells from expression plasmids that are individually transfected in separate wells of a 384-well plate (39). The entire library of plasmids is arrayed in duplicate in a matrix format and transfected into HEK-293T cells, followed by incubation for 36 h to allow protein expression. Before specificity testing, optimal antibody concentrations for screening were determined by using cells expressing positive (membrane-tethered Protein A) and negative (mock-transfected) binding controls, followed by flow cytometric detection with an Alexa Fluor-

conjugated secondary antibody (Jackson ImmunoResearch Laboratories). Based on the assay setup results, ab1 (20 µg/ml) was added to the MPA. Binding across the protein library was measured on an iQue3 (Ann Arbor, MI) using the same fluorescently labeled secondary antibody. To ensure data validity, each array plate contained positive (Fc-binding; SARS-CoV-2 S protein) and negative (empty vector) controls. Identified targets were confirmed in a second flow cytometric experiment by using serial dilutions of the test antibody. The identity of each target was also confirmed by sequencing.

**Ethics statement.** Human ACE2 transgenic C3B6 mice (6–9 weeks old) were used for all experiments. The study was carried out in accordance with the recommendations for care and use of animals by the Office of Laboratory Animal Welfare (OLAW), National Institutes of Health and the Institutional Animal Care and Use Committee (IACUC) of University of North Carolina (UNC permit no. A-3410-01).

**Statistical analyses.** The statistical significance of difference between IgG1 treated and control mice lung virus titers was analyzed by the one-tailed Mann Whitney *U* test calculated using GraphPad Prism 7.0. A *p* value < 0.05 was considered significant. \* *p* < 0.05.

## Figures and Figure Legends

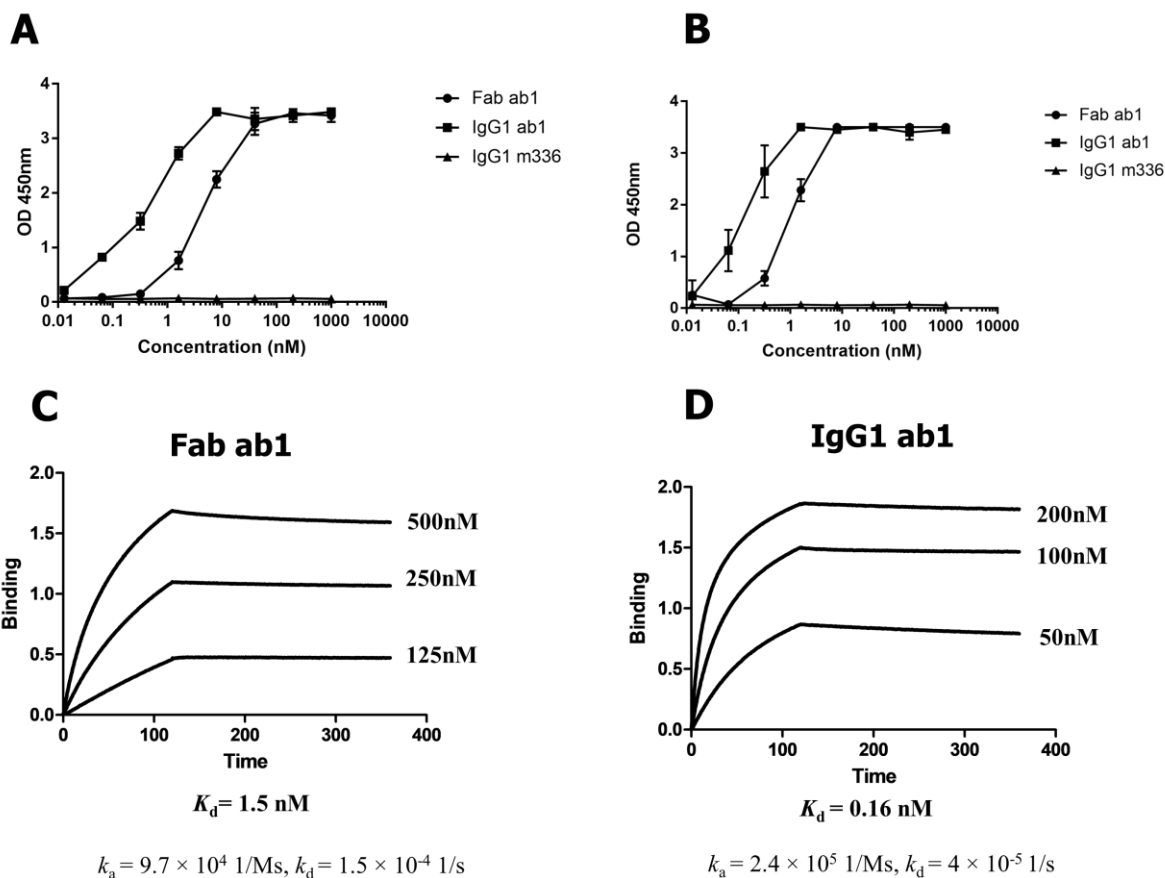

**Figure 1. Binding of Fab and IgG1 ab1 to SARS-CoV-2 RBD and S1 proteins as measured by ELISA (A and B) and Blitz (C and D).** (A) Fab and IgG1 ab1 binding to recombinant RBD measured by ELISA. (B) Fab and IgG1 ab1 binding to recombinant S1 measured by ELISA; the MERS-CoV antibody IgG1 m336 was used as a negative control. 100 ng of antigen was coated and serially diluted antibody was added after blocking. After washing, the binding was detected by HRP conjugated anti-FLAG (M2 clone) for Fab ab1, and by HRP conjugated anti human Fc for IgG1 ab1. Experiments were performed in duplicate and the error bars denote  $\pm$  SD,  $n=2$ . (C) Blitz sensorgrams for Fab ab1 binding to RBD-Fc. RBD-Fc was coated on the protein A sensors and different concentrations of the Fab ab1 were used to bind to the sensors followed by

dissociation. The  $k_a$  and  $k_d$  values were obtained by fitting based on the 1:1 binding model. **(D)** Sensorgrams for IgG1 ab1 binding to RBD-Fc. Biotinylated RBD-Fc was coated on Biotin sensor and IgG1 ab1 was used for binding. The  $k_a$  and  $k_d$  values were obtained by fitting to achieve the fitting parameter  $R^2 > 0.99$ .

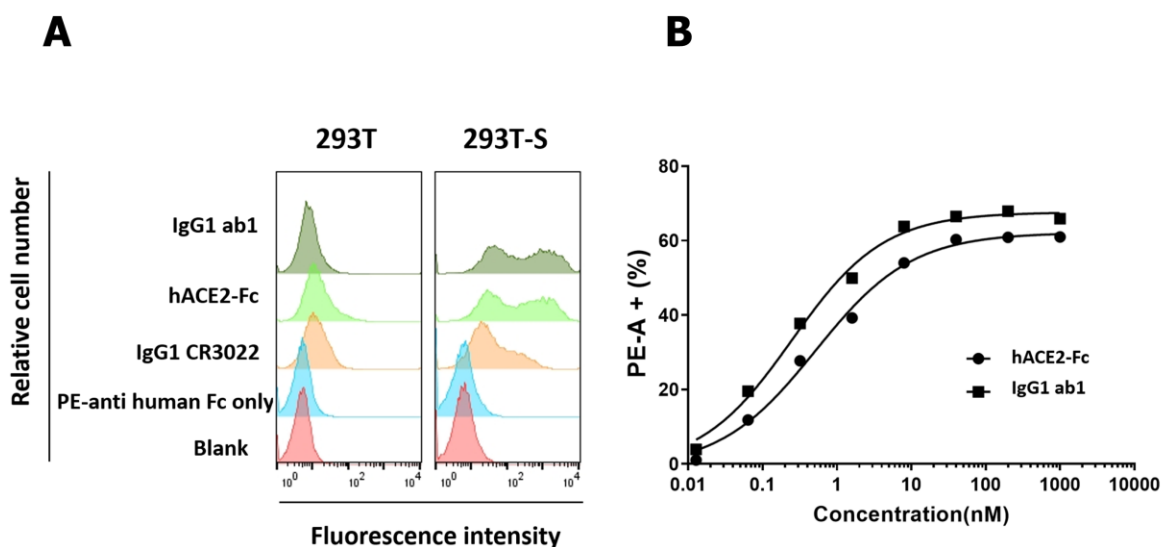

**Figure 2. Binding of IgG1 ab1 and hACE2-Fc to 293T cells overexpressing SARS-CoV-2 S (293T-S).** (A) Binding of IgG1 ab1, hACE2-Fc and IgG1 CR3022 to S transiently transfected 293T cells. The 293T cells without transfection serve as a control. Antibodies or proteins were evaluated at the concentrations of 1  $\mu$ M. Note the lack of non-specific binding of IgG1 ab1 to 293T cells at this high concentration. (B) Concentration-dependent binding of IgG1 Ab1 and hACE2-Fc to 293T-S cells. After 48 h transfection, cells were stained by serially diluted IgG1 ab1 or hACE2-Fc followed by staining using PE conjugated anti human Fc antibody. The percentage of PE-A positive cells is gated and plotted against the antibody concentration. Binding  $EC_{50}$  was fitted by using the mode of “[agonist] vs. response -- variable slope (four

parameter)" in the Graphpad Prism 7. IgG1 ab1 showed higher binding avidity to 293T-S cells than hACE2-Fc (0.25 nM *v.s.* 0.52 nM for IgG1 ab1 and hACE2-Fc 50% binding, respectively).

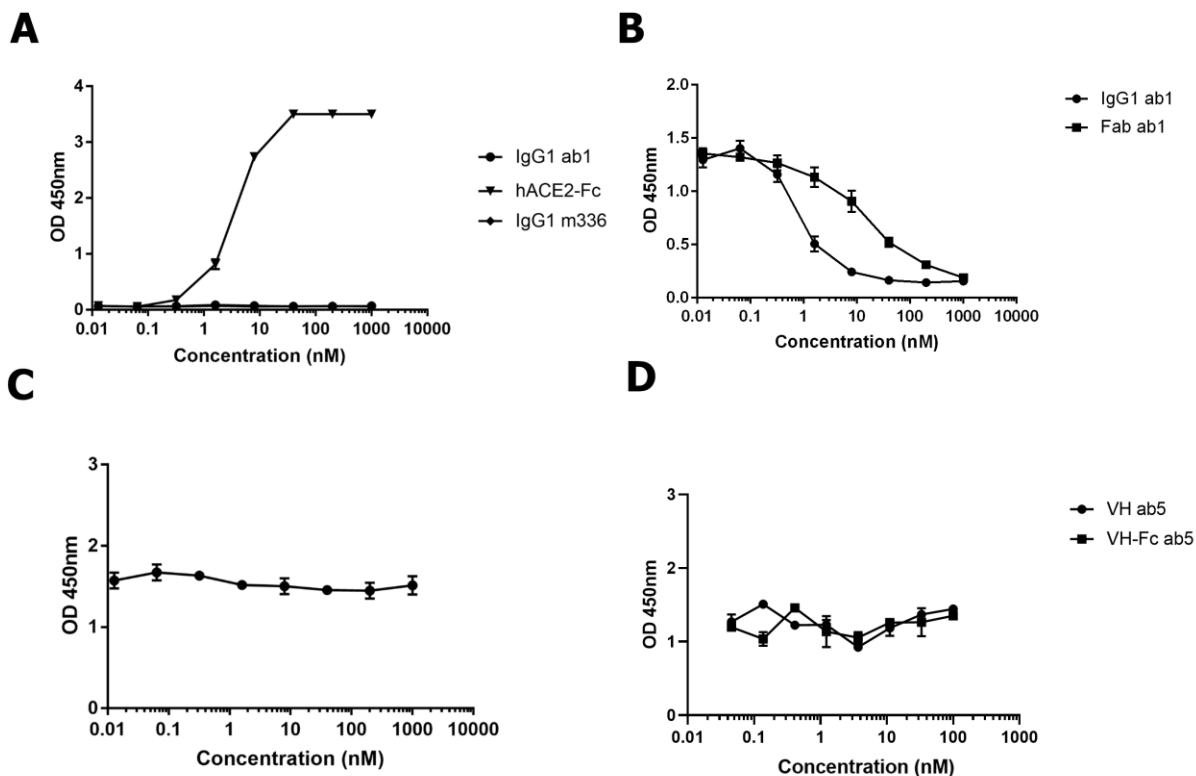

**Figure 3. Lack of binding of IgG1 ab1 to SARS-CoV S1 and competition of ab1 with hACE2, CR3022 and ab5 for binding to SARS-CoV-2 RBD as measured by ELISA. (A)** Lack of binding of IgG1 ab1 to SARS-CoV S1 with hACE2-Fc as a positive control and IgG1 m336 as a negative control. **(B)** Competition of ab1 with hACE2 for binding to SARS-CoV-2 RBD; 100 ng of RBD-Fc was coated and 5-fold serially diluted IgG1 or Fab ab1 were added in the presence of 2 nM hACE2-mFc (mouse Fc) followed by PBST washing. For detection, an HRP conjugated anti mouse Fc antibody was used. **(C).** Competition ELISA between Fab ab1 and CR3022. ~10 nM IgG1 CR3022 was incubated with RBD-his in the presence of different concentrations of Fab ab1. After washing, detection was achieved by using HRP conjugated anti human Fc antibody. **(D).** Competition ELISA between ab1 and ab5. ~6 nM biotinylated IgG1

ab1 was incubated with RBD-Fc in the presence of different concentrations of VH ab5 or VH-Fc ab5. After washing, detection was made by using HRP conjugated streptavidin. Experiments were performed in duplicate and the error bars denote  $\pm$  SD, n =2.



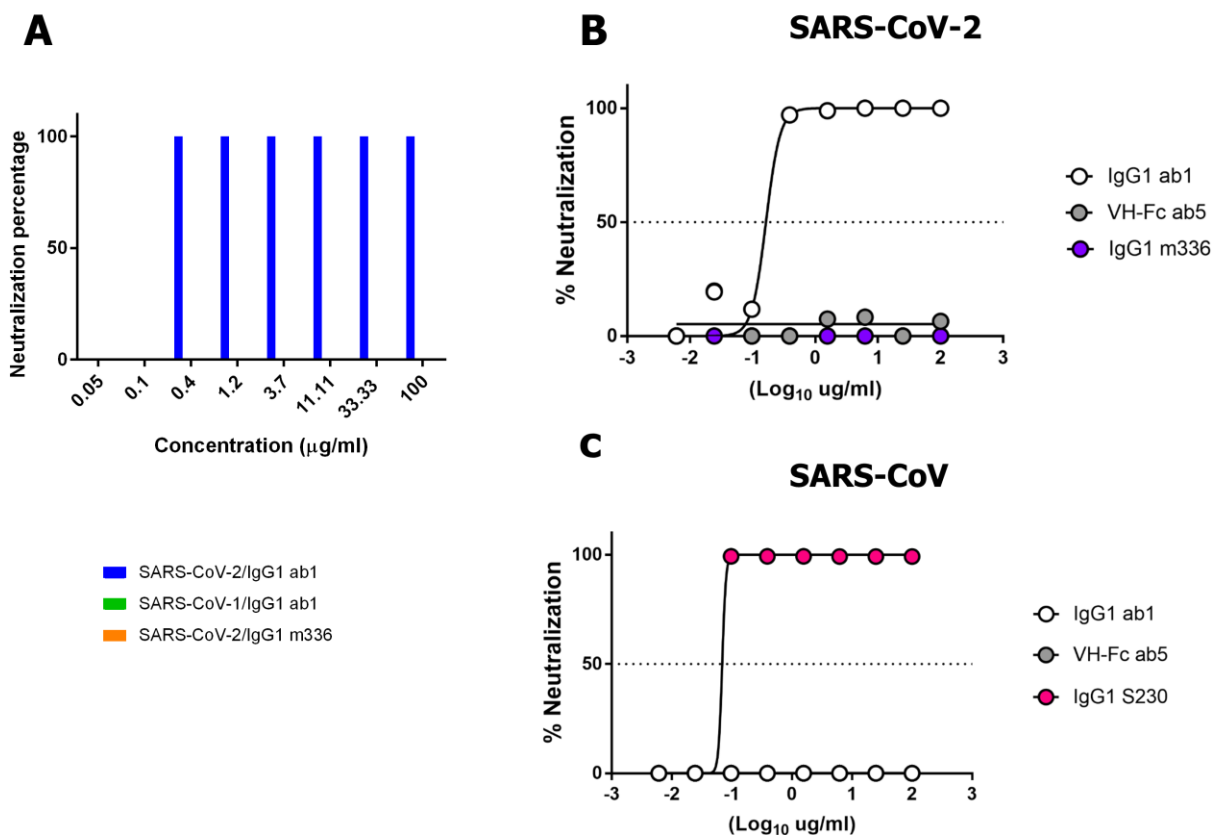

**Figure 4. Neutralization activity of IgG1 ab1 and VH-Fc ab5 against SARS-CoV-2 live virus measured by two different assays. (A)** Neutralization of live virus by a microneutralization assay. Antibodies were pre-mixed with live virus for 2 h at room temperature before adding to the VeroE6 cells. After incubation for 4 days at 37°C, virus-induced cytopathic effects were observed under the microcopy. The neutralization capacity was expressed as the lowest concentration capable of completely preventing virus induced cytopathic effect in 100% of the wells. The neutralization of SARS-CoV live virus by IgG1 ab1 was also evaluated. The MERS-CoV antibody m336 was used as a negative control. **(B)** Neutralization of live SARS-CoV-2 by a reporter gene assay. **(C)** Neutralization of live SARS-CoV by the same reporter gene

assay. For the reporter gene assay, full-length viruses expressing luciferase were designed and recovered via reverse genetics. Viruses were tittered in Vero E6 USAMRID cells. 4-folds serially diluted mAb samples with highest concentration of 100  $\mu\text{g/ml}$  were incubated with SARS-UrbaininLuc, and SARS2-SeattlenLuc viruses at 37°C with 5%  $\text{CO}_2$  for 1 hour followed by adding into 20,000 Vero E6 USAMRID cells in duplicate. Following 48 hours infection, cells were lysed and luciferase activity was measured via Nano-Glo Luciferase Assay System (Promega). SARS-CoV and SARS-CoV-2 neutralization  $\text{IC}_{50}$  were defined as the sample concentration at which a 50% reduction in RLU was observed relative to the average of the virus control wells. Experiments were performed in duplicate and  $\text{IC}_{50}$  was obtained by the fitting of neutralization curves with the “sigmoidal dose-response (variable slope)” equation in Graphpad Prism 7.

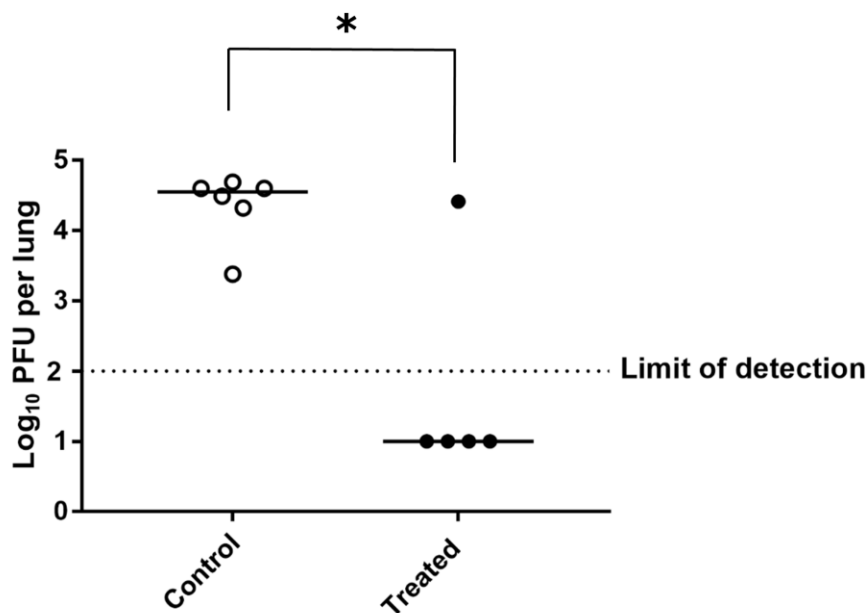

**Figure 5. IgG1 ab1 protects hACE2 transgenic mice from SARS-CoV-2 infection.** Mice were treated i.p. with 0.3 mg of IgG1 ab1 antibody or controls 15 hours prior to intranasal infection with  $10^5$  PFU of SARS-CoV-2. No weight loss was observed over the course of the two-day infection. Lung tissue was homogenized in PBS and virus replication assessed by plaque assay on VeroE6 cells. The assay limit of detection was 100 PFU. The statistical significance of difference between IgG1 treated and control mice lung virus titer was analyzed by the one-tailed Mann Whitney *U* test calculated using GraphPad Prism 7.0. A *p* value  $<0.05$  was considered significant. \* *p*  $<0.05$ . The *p* value for our comparison is 0.0113 and the *U* value is 2 demonstrating significant difference between IgG1 ab1 treated and control groups.

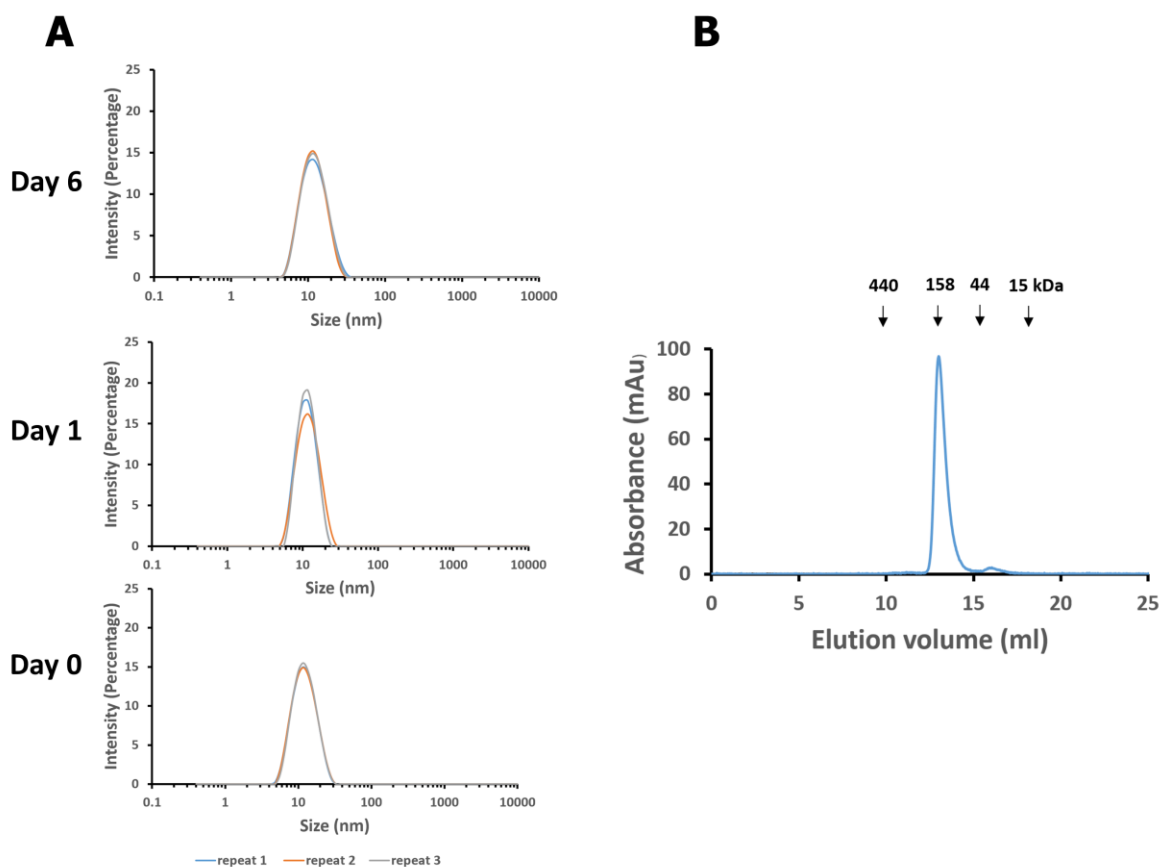

**Figure 6. Evaluation of the IgG1 ab1 aggregation by dynamic light scattering (DLS) and size exclusion chromatography (SEC).** (A) Evaluation of the aggregation of IgG1 ab1 by DLS. IgG1 ab1 (2 mg/ml) buffered in PBS was incubated at 37°C. On day 0, day 1 and day 6, samples were taken out for DLS measurement on Zetasizer Nano ZS ZEN3600 (Malvern Instruments Limited, Westborough, MA) to determine the size distribution. All measurements were repeated three times. (B) Evaluation of of IgG1 ab1 aggregation by SEC. Size exclusion was performed by loading 0.22  $\mu$ m membrane-filtered proteins (150  $\mu$ l, 1.5 mg/ml) onto the Superdex 200 increase 10/300 GL column. Protein was eluted by PBS buffer in a flow rate of 1.5 mL/min. The arrows indicate the peaks of the MW standards in PBS.

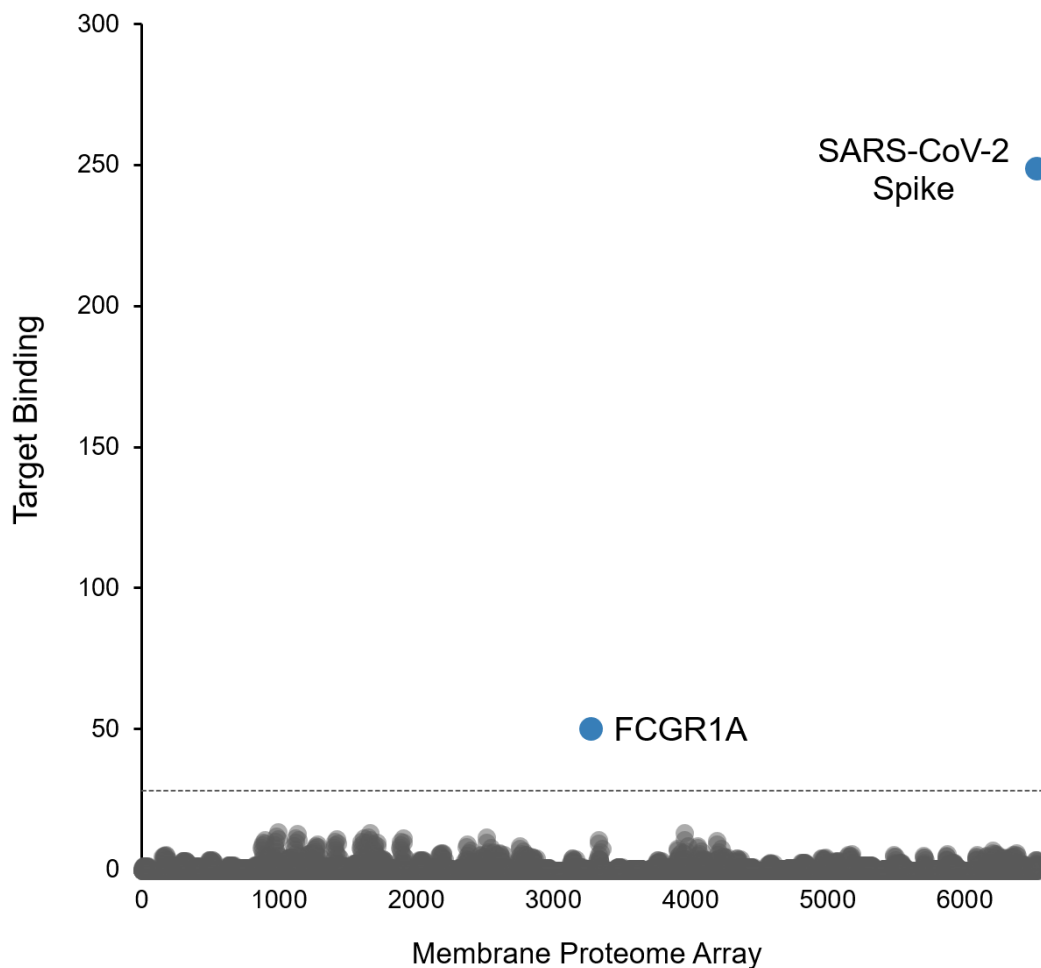

**Figure 7 Lack of Non-specific Binding Measured by a Membrane Proteome Array.**

Specificity testing of IgG1 ab1 (20  $\mu\text{g}/\text{ml}$ ) was performed using the Membrane Proteome Array (MPA) platform which comprises 5,300 different human membrane proteins, each overexpressed in live cells. To ensure data validity, each array plate contained positive (Fc-binding, FCGR1A; IgG1 ab1 binding, SARS-CoV-2) and negative (empty vector) controls. Identified targets were confirmed in a second flow cytometric experiment by using serial dilutions of the test antibody. The identity of each target was also confirmed by sequencing.

## Supplementary Figures and Figure Legends

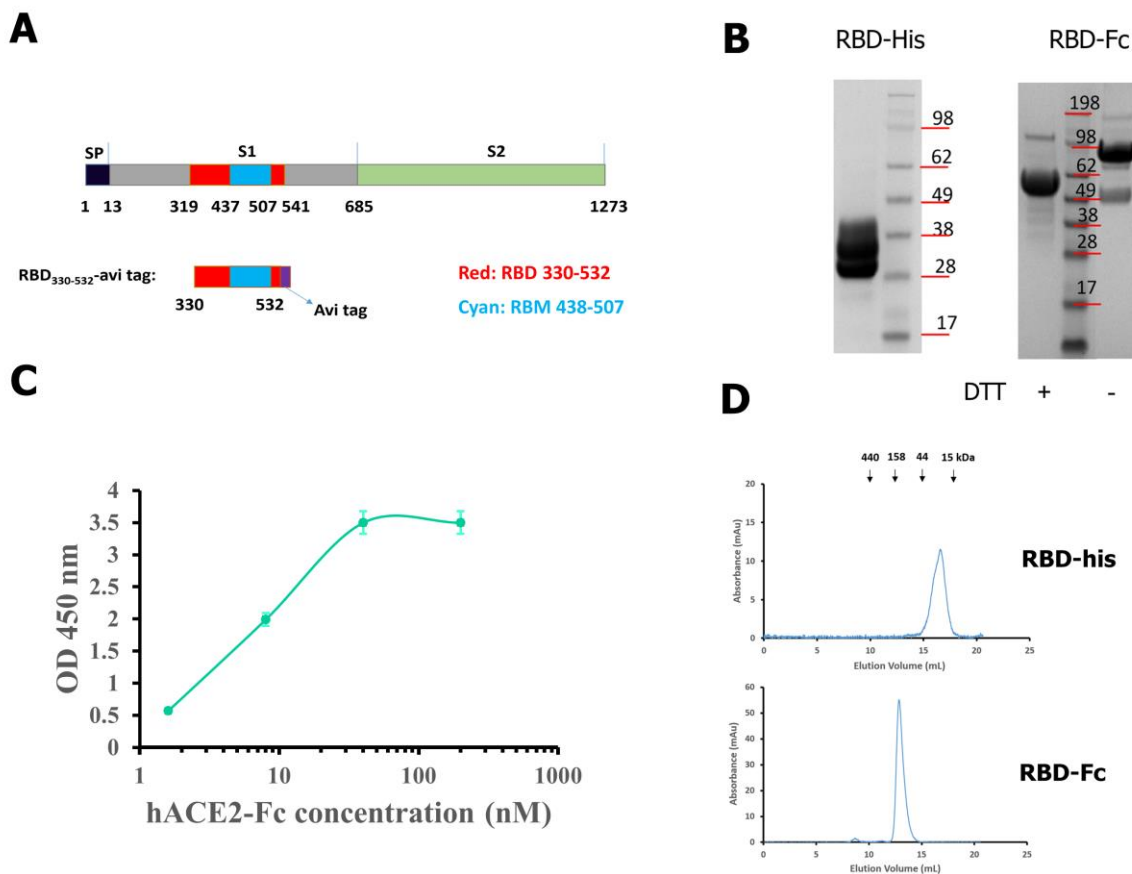

**Figure S1. Schematic representation of SARS-CoV-2 S and RBD, and characterization of the RBD as an antigen for panning.** (A) Schematic representation of the SARS-CoV-2 S and RBD. RBD is highlighted by the red color and the receptor-binding motif (RBM) is pictured by cyan color. RBD<sub>330-532</sub> is recombinantly expressed in mammalian cells with a C terminal avi tag for in vitro BirA mediated biotinylation. (B) SDS-PAGE of RBD-avi-his and RBD-Fc in the presence or absence of DTT. The apparent molecular weight (MW) of RBD-avi-his (heterogeneity ranging from 28 to 38 kDa due to glycosylation) and RBD-Fc (~100 kDa without DTT and ~50 kDa with DTT) are consistent with their theoretically calculated MWs. (C) ELISA measurement of binding of the recombinant RBD-avi-his to hACE2-mFc (mouse Fc, Sino

Biologicals). 50 ng RBD-avi-his was coated on plate with incubation of serially diluted hACE2-mFc. Binding was detected by using HRP conjugated anti-mouse Fc. Experiments were performed in duplicate and the error bars denote  $\pm$  SD, n=2. **(D)** Evaluation of RBD-his and RBD-Fc by size exclusion chromatography. Size exclusion was performed by the Superdex 200 increase 10/300 GL column. The arrows indicate the peaks of the MW standards in PBS. The well-dispersed single peak indicated RBD-his and RBD-Fc exist as monomers in PBS solution.

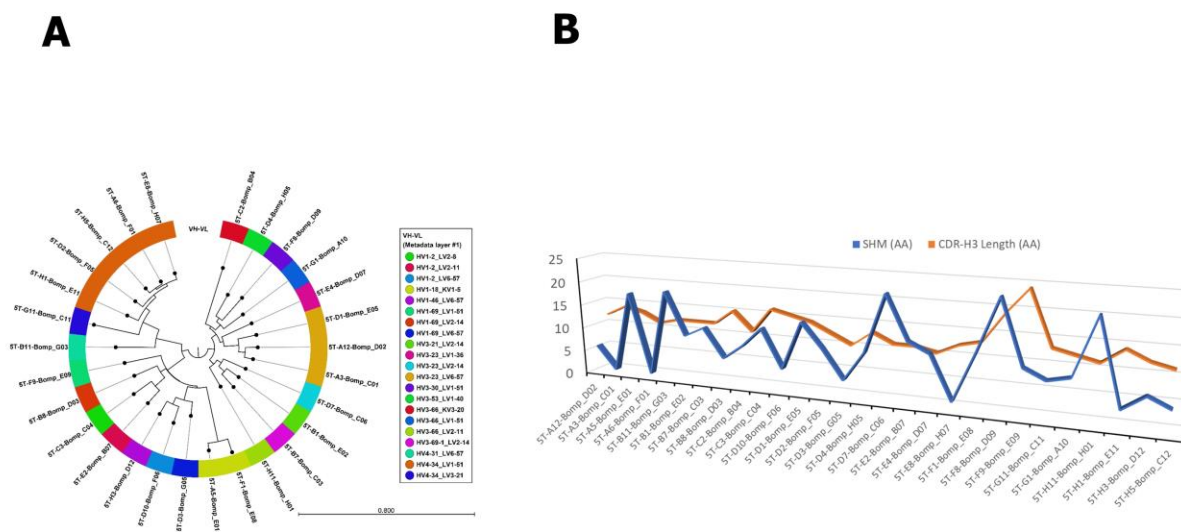

**Figure S2. Analysis of the HC/LC usage, and somatic hypermutation (SHM) and CDR-H3 length of 28 SARS-CoV-2 binders selected from our scFv phage library. (A)** An unrooted circular phylogram tree was constructed using the VH-VL concatenated sequences of 28 unique anti-SARS CoV-2 RBD scFv clones that were mapped, and color coded by IGHV/IGLV germline pairing. **(B)** A 3-D line chart showing the number of SHM and CDR-H3 length in amino acid (AA) for each clone.



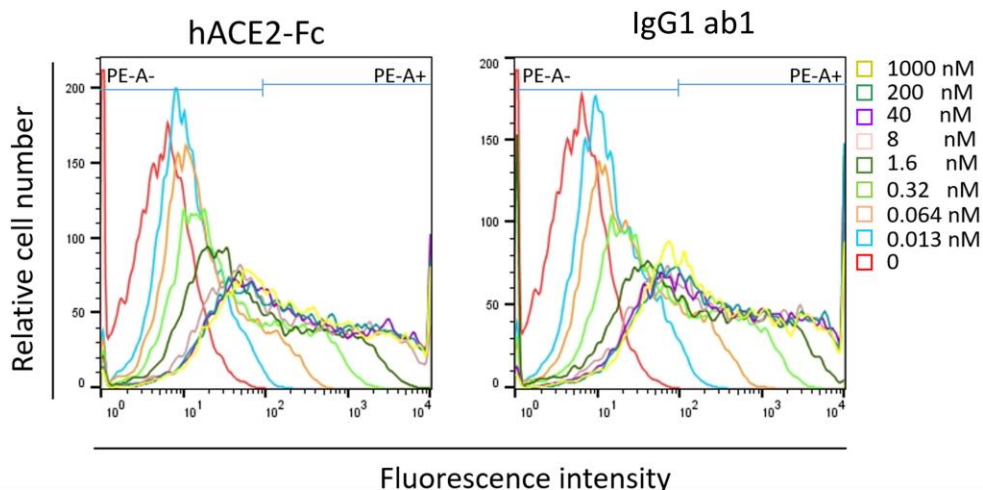

**Figure S3. Evaluation of IgG1 ab1 and hACE2-Fc binding avidity to cell surface associated SARS-CoV-2 S by flow cytometry.** Cells were incubated with serially diluted antibodies or hACE2-Fc and subsequently with PE conjugated anti-human Fc antibody for flow cytometry analysis. Percentage of PE-A+ cells were defined by the above gate strategy in FlowJ, representing the percentage of IgG1 ab1 and hACE2-Fc bound 293T-S cells.

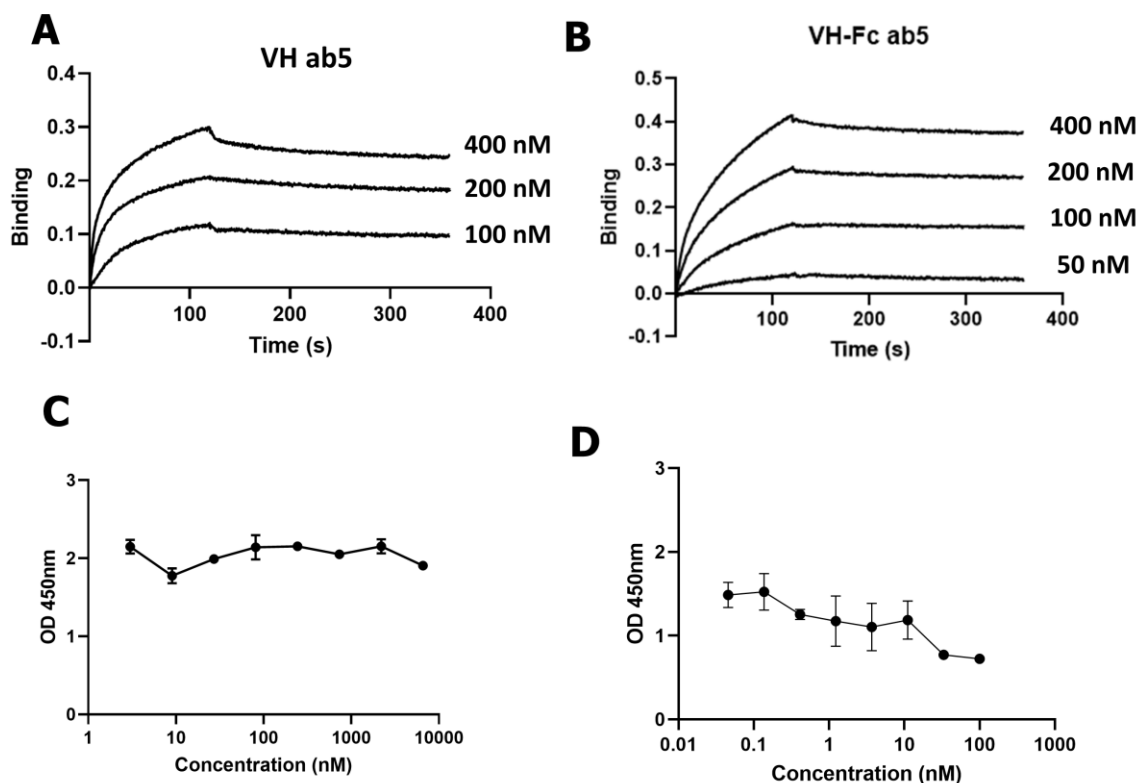

**Figure S4. Characterization of VH and VH-Fc ab5 binding to RBD and competition with hACE2 and other antibodies as measured by ELISA and Blitz. (A)** Blitz sensorgrams for VH ab5 binding to RBD-Fc. **(B)** Blitz sensorgrams for VH-Fc ab5 binding to biotinylated RBD-Fc. Antigens were coated on the protein A or streptavidin sensors and different concentrations of antibody were used to bind to the sensors followed by dissociation. The  $k_a$  and  $k_d$  values were obtained by fitting based on the 1:1 binding model. The equilibrium dissociation constants,  $K_d$ , for VH and VH-Fc ab5 were 4.7 nM and 3.0 nM, respectively. **(C)** Competition ELISA between hACE2 and ab5. Biotinylated hACE2-Fc (10 nM) was incubated with RBD-Fc in the presence of different concentrations of VH ab5. After washing, bound hACE2-Fc was detected by using

HRP conjugated streptavidin. **(D)**. Competition ELISA with CR3022 for binding to SARS-CoV-2 RBD. IgG1 CR3022 (10 nM) was incubated with RBD-his in the presence of different concentrations of VH ab5. After washing, bound CR3022 was detected by using HRP conjugated anti human Fc antibody. Ab5 showed weak competition with CR3022 for binding to SARS-CoV-2 RBD. All the ELISA experiments were performed in duplicate and the error bars denote  $\pm$  SD, n =2.
